1  
2  
3  
4  
5  
6  
7  
8  
9  
10  
11  
12  
13  
14  
15  
16  
17  
18  
19  
20  
21  
22  
23  
24  
25  
26

# **Fitness effects of host-bacterial interactions – the microbial perspective**

Peter Deines<sup>1\*</sup>, Katrin Hammerschmidt<sup>2</sup> and Thomas CG Bosch<sup>1</sup>

<sup>1</sup>Zoological Institute, Christian Albrechts University Kiel, 24118 Kiel, Germany

<sup>2</sup>Institute of General Microbiology, Christian Albrechts University Kiel, 24118 Kiel, Germany

\*Correspondence:

Peter Deines, Zoological Institute, Christian Albrechts University Kiel, Am Botanischen Garten 1-9, 24118 Kiel, Germany

Tel: +49-431-880-4171

Email: [pdeines@zoologie.uni-kiel.de](mailto:pdeines@zoologie.uni-kiel.de)

Running title: Interactions drive microbiome species composition

Conflict of Interests

The authors declare no conflict of interest.

## Abstract

Organisms and their resident microbial communities form a complex and mostly stable ecosystem. It is known that the specific composition and abundance of certain bacterial species affect host health and *Darwinian fitness*, but the processes that lead to these microbial patterns are unknown.

We investigate this by deconstructing the simple microbiome of the freshwater polyp *Hydra*. We contrast the performance of its two main bacterial associates, *Curvibacter* and *Duganella*, on germ free hosts with two *in vitro* environments over time. We show that interactions within the microbiome but also host modulation lead to the observed species frequencies and abundances. More specifically we find that rare microbiome members are essential for achieving the observed community composition, which ultimately sets the maximum carrying capacity. Bacterial fitness strongly depends on the environment: while *Duganella* performs better than *Curvibacter* in a non-host habitat, *Curvibacter* benefits through the host association.

This is of particular interest because *Curvibacter* and its host show a history of co-evolution, as inferred from phylogenies, whereas the colonization with *Duganella* seems to be a recent event. Our findings oppose the assumption that bacteria always benefit through the association with the host and poses questions regarding the long-term maintenance of such relationships.

## Introduction

Eukaryotes form a distinct habitat for microbial communities (microbiomes) and these microbial associations are integral to life. The host with its associated microbial community, often dominated by bacteria but co-habited by fungi, protozoa, archaea, and viruses, is termed metaorganism. Microbiomes can contain from few up to thousands of microbial species - the human microbiome, for example, is estimated to be comprised of about 5000 bacterial species [1-3]. These host-associated microbial communities have been shown to enhance host function and contribute to host fitness and health [4]. Changes in microbiome diversity, function, and density have been linked to a variety of disorders in many organisms [5-8].

A major goal in host-microbe ecology is to explore the ecological and evolutionary dynamics of microorganisms within their communities. Of particular relevance is to improve our understanding of factors that shape the stability and resilience of these communities, despite different fitness trajectories of the microbiome members. The microbial response to stress or perturbations, e.g. exposure to a new substrate, provides a selective advantage to certain members of the community. If the system cannot tolerate the change and the microbial community shifts dramatically, a different equilibrium state will be reached [9]. Frequency-dependent selection forces the host to adapt to these changes and select for or against the most frequent genotypes of their associated microbiota [10]. There is, for example, strong evidence that species-specific antimicrobial peptides (AMPs) shape, control, and confine host-species specific bacterial associations [for example 11, 12]. In addition, microbial communities are not evenly distributed, e.g. along the gastrointestinal tract or between the lumen and the epithelial surfaces [2, 13, 14]. These significant differences in niches or micro-habitats and their occupancy is known as spatial heterogeneity and will affect community assembly rules and dynamics [15, 16]. Interspecies metabolic exchange is another key

biotic force acting as a major driver of species co-occurrence in diverse microbial communities [17].

One aspect that has been so far neglected in metaorganism research is why a stable microbiome can persist in a specific host lineage for many host generations. Central to this is the question whether microbes benefit from the association with the host. This could either happen through direct interaction with the host or indirectly, through interactions with another microbial strain within the microbiome. Host-dependent advantages for the symbiont range from the availability of host-derived nutrients, a competition-free environment to reduced predation risk [18]. If members of the microbiome benefit from the association with a particular host, one would expect their capacity to reproduce, i.e. their *Darwinian fitness*, to be higher in the host relative to an alternative habitat.

Methods for quantifying microbial fitness range from estimating absolute fitness, where population growth is measured from which maximum growth rates can be calculated, to estimates of relative fitness. The latter is of particular relevance as the fitness of a focal microbial lineage is measured *relative* to another microbial lineage. This provides a better representation of the turnover of strains in microbial populations and also closely corresponds to the meaning of fitness in evolutionary theory [19]. The basic design of such an experiment involves mixing populations of the two strains together in a particular initial ratio in the test environment and measuring their relative contributions to future generations. Under certain ecological conditions the relative fitness of two strains is dependent upon their relative frequencies (frequency-dependent selection) [20]. These methods of measuring microbial fitness can easily be applied to host-microbe systems and help us in understanding the underlying dynamics. This will yield insights into the role that microbes played in the evolution of eukaryotes and into the ecology and evolution of host-microbe associations in general [21]. Here, it is important to unravel the extent to which the observed pattern simply result from

intrinsic properties, such as microbial growth rates, interactions of the microbes, which could be recapitulated *in vitro* with co-culture experiments, or whether it is an emergent property of that particular host-microbe system [22].

We here test whether microbial associates benefit from their association with the host and their fellow community members and follow their ecological interactions within the microbiome. We use the freshwater polyp *Hydra vulgaris* and its microbiome, which has become a valuable experimental model in metaorganism research as it provides an excellent bridge between the simplicity of synthetic communities and the mouse model [23]. *Hydra's* ectodermal epithelial cells are covered with a multi-layered glycocalyx that provides a habitat for a species-specific and core microbiome of low complexity [11, 24, 25], from which most microbes can be cultured *in vitro* [25, 26]. This allows for an integrated approach based on constructing synthetic communities of various complexities and contrasting the host (*in vivo*) to *in vitro* habitats [23]. We focus on the two most abundant members of the microbiome that together constitute about 85% of *Hydra's* simple microbiome, *Curvibacter* sp. AEP1.3 and *Duganella* sp. C1.2, (hereafter called *Curvibacter* and *Duganella*) where abundances of *Curvibacter* are several magnitudes higher as compared to *Duganella* [26]. Previous work on species interactions suggested that continued coexistence depends heavily on relative growth rates. Using invasion-from-rare experiments we explore the potential for coexistence under different environmental conditions (host and non-host habitat) and contribute to a better understanding whether the host alters microbial interactions that potentially lead to coexistence in simple microbiomes.

## Materials and Methods

### Animals used, culture conditions and generation of germ-free animals

*Hydra vulgaris* (strain AEP) was used for carrying out experiments and cultured according to standard procedures at 18°C in standardized culture medium (Hydra medium (HM)) [27]. Animals were fed three times a week with 1st instar larvae of *Artemia salina*. Germ-free (GF) polyps were obtained by treating wild-type (WT) animals with an antibiotic cocktail solution containing 50  $\mu$ g/ml ampicillin, neomycin, streptomycin, rifampicin and 60  $\mu$ g/ml spectinomycin as previously described [28, 29]. The antibiotic cocktail solution was exchanged every 48 h and the antibiotic treatment lasted for two weeks, after which polyps were transferred into antibiotic-free sterile HM for recovery (four days). The germ-free status of polyps was confirmed as previously described [28]. During antibiotic treatment and re-colonization experiments, polyps were not fed.

### Bacterial strains and media

The bacterial strains used in this study are *Curvibacter* sp. AEP1.3 and *Duganella* sp. C1.2., which have been isolated from *Hydra vulgaris* (strain AEP) [26]. These bacteria were cultured from existing isolate stocks in R2A medium at 18°C, shaken at 250 r.p.m for 72 h before use in the different experiments.

### Carrying capacity of the host

To determine the carrying capacity of the *Hydra* habitat the microbial load of individual *Hydra* polyps (N=16) was determined. In addition to wild-type polyps the carrying capacity of conventionalized polys (N=12), obtained by incubating germ-free polyps with tissue homogenates of wild-type animals (per germ-free polyp one wild-type polyp was used) for 24 h was also determined. To test whether the carrying capacity can artificially be increased or destabilises upon self-challenge we added either *Curvibacter*

or *Duganella* to wild-type polyps (N=6) (approximately  $5 \times 10^3$  cells for 24 h). After incubation all polyps were washed with and transferred to sterile HM and further incubated at 18°C and sampled after 120 h.

#### **Tracking microbial mono-associations in *Hydra* over time**

Germ-free polyps were inoculated in their aquatic environment with single bacterial strains (mono-associations). Individual germ-free polyps were incubated with  $5 \times 10^3$  cells of *Curvibacter* or *Duganella* in 1.5 ml Eppendorf tubes containing 1 ml of sterile HM. After 24 h of incubation all polyps were washed with and transferred to sterile HM, incubated at 18°C and followed over a period of 216 h. For each treatment 6 polyps per time point were independently analysed. Every 48 h individual polyps were homogenized in an Eppendorf tube using a sterile pestle and serial dilutions of the homogenate were plated on R2A agar plates to determine colony-forming units (CFUs) per polyp.

#### **Microbial growth kinetics of mono- and di-associations *in vivo* and *in vitro***

To study the initial phase of colonization, i.e. 96 h post inoculation (see Fig. 1B) in more detail microbial growth of *Curvibacter* and *Duganella* was determined in different habitats; the host habitat (*in vivo*) and two different microcosm environments (*in vitro*). The static incubation provided a spatially structured habitat (heterogeneous), whereas shaking of the microcosms (mixed treatment) eliminated the spatial structure (homogenous).

*Mono-associations:* All germ-free polyps and microcosms were inoculated from the same bacterial inoculation culture with approximately  $5 \times 10^3$  cells of *Curvibacter* or *Duganella* for 24 h, washed with and transferred to sterile HM. Samples were taken every 12 h for 96 h. For *Hydra* six polyps were sacrificed at each time point and colony-forming units (CFUs) were determined as described above. As microcosms 24-well

plates were used. Wells were filled with 2 ml of R2A medium, inoculated and incubated at 18°C either under static or shaken (200 r.p.m) conditions. Each time point was replicated four times and serial dilutions were plated on R2A agar plates to determine CFUs. Growth rates of each strain (A and B) were determined for the exponential growth phase (36-48 h) and were calculated as  $g = \ln (A_f/A_0)$  and  $g = \ln (B_f/B_0)$ , where  $A_0$ ,  $B_0$  is the starting density at time 0 and  $A_f$ ,  $B_f$  is the final density at time  $f$ .

*Di-associations:* Density dependent competitiveness fitness assays of the two most dominant colonizers *Curvibacter* and *Duganella* were performed *in vivo* and *in vitro*. The same host and microcosm experiments as described above were performed except for using microbial di-associations of *Curvibacter* and *Duganella* with the frequency of *Curvibacter* being rare (10:90), equal (50:50), or dominant (90:10). As *Curvibacter* and *Duganella* form distinct colonies on R2A agar plates, their frequency can be determined by plating serial dilutions [30]. Six polyps and four microcosm replicates were assayed per treatment (static and mixed) and time point. Also this data allowed determining the different carrying capacities of the *in vivo* and *in vitro* habitats used. Malthusian parameters were calculated for both bacterial strains (A and B),  $m = \ln (N_f/N_0)/\text{hour}$ , where  $N_0$  and  $N_f$  were the initial and final densities. The relative performance of the two strains was expressed in terms of the selection rate constant ( $r$ ). Note that this measure of performance should be preferentially used over the more commonly used relative fitness ( $W$ ), when one competitor is much less fit than the other [31, 32], as was the case in our study. The selection rate constant was calculated as  $r = m_B - m_A$ . Accordingly,  $r = 0$  implies that there is no difference in growth rates of the two strains,  $r > 0$  indicates that strain B is advantageous in population growth ( $r = 1$  indicates a 10-fold increase in the ratio of B vs. A abundances), while  $r < 0$  suggests that strain B fails in invading population of strain A.



## Statistical analysis

A Welch ANOVA (and subsequent Dunnett's posthoc test) was used to test for differences in bacterial abundance patterns ('bacteria per *Hydra*') in wild-type versus manipulated hosts as variances between the different groups were not equally distributed.

Differences during mono-colonizations of *Curvibacter* and *Duganella* over time were assessed using a Generalized linear model (error structure: normal; link function: identity). The response variable was 'bacteria per *Hydra*', and explanatory variables were 'bacterial species', 'time' and 'bacterial species' x 'time'. Differences between the two bacterial species on each day were detected with post hoc contrasts.

Analysis of variance (ANOVA) and subsequent post hoc t-tests were used to test for differences in growth rates of the two competitors when grown singly in the different environments. The response variable was 'growth rate', and explanatory variables were 'bacterial species', 'environment' and 'bacterial species' x 'environment'.

Differences in the growth rates in the di-associations of *Curvibacter* and *Duganella* in the different environments and dependence on initial frequency were assessed using a Generalized linear model (error structure: normal; link function: identity) and post hoc contrasts. For each bacterial species, a separate model was calculated with the response variables being either 'growth rate *Curvibacter*' or 'growth rate *Duganella*', and the explanatory variables were 'environment', 'starting density' and 'environment' x 'starting density'.

Differences in the selection rate constant of *Curvibacter* in the different environments and dependent on initial frequency were assessed using a Generalized linear model (error structure: normal; link function: identity) and post hoc contrasts. The response variable was 'selection rate constant *Curvibacter*' and the explanatory variables were 'environment', 'starting density' and 'environment' x 'starting density'.

Sample size was chosen to maximise statistical power and ensure sufficient replication. Assumptions of the tests, that is, normality and equal distribution of variances, were visually evaluated. Non-significant interactions were removed from the models. All tests were two-tailed. Effects were considered significant at the level of  $P < 0.05$ . All statistical analyses were performed with JMP 9. Graphs were produced with GraphPad Prism 5.0, and Adobe Illustrator CS5.1.

## Results

### Carrying capacity of the *Hydra* host

The carrying capacity of the *Hydra* habitat is highly stable among single *Hydra* wild-type polyps with  $1.7 \times 10^5$  CFUs/polyp and at its maximum with the native microbiome. Manipulations of the microbial community lead to significant changes in bacterial numbers (Welch ANOVA,  $F_3=7.054$ ;  $P<0.005$ ; Fig. 1A). The addition of single bacterial species (*Curvibacter* or *Duganella*) to wild-type polyps does not increase the carrying capacity but, in the case of *Curvibacter*, leads to a significant reduction in microbial population size. In contrast does the addition of *Duganella* not significantly shift the bacterial numbers (Fig. 1A). Conventionalised animals (germ-free polyps incubated with tissue homogenates of wild-type animals) show a carrying capacity, which is not significantly different compared to wild-type polyps (Fig. 1A), indicating the usability of the germ-free polyps for the manipulation and construction of synthetic bacterial communities on the host/ *in vivo*.

### Tracking microbial mono-colonisations in *Hydra* over time

In mono-associations *Curvibacter* and *Duganella* populations display typical bacterial growth dynamics. Following a lag and exponential phase, both strains reach a stationary phase after roughly 72 h with a stable population size/carrying capacity per host (Fig. 1B). After 72 h we find significant differences in the carrying capacity between both

strains, *Curvibacter* being higher than *Duganella* (estimated by post hoc contrasts; Generalized linear model: Full model:  $\chi^2=54.360$ , d.f.=9,  $P<0.0001$ ; bacterial species x days post exposure:  $\chi^2=18.326$ , d.f.=4,  $P=0.0011$ ). These significant differences last until the end of the experiment. Once carrying capacity of mono-associations is reached, we find a population size of about  $10^4$  CFUs per host for *Curvibacter*, whereas for *Duganella* the population size reaches on average only  $1.5 \cdot 10^3$  CFUs per host. Further, both mono-associations do not reach the carrying capacity of wild-type polyps. The variation in bacterial density between hosts is significantly higher in *Curvibacter* than in *Duganella* (Levene:  $F_1=21.496$ ,  $P<0.0001$ ). No extinction events are observed in either strain after successful establishment during the mono-colonisation experiments.

#### **Microbial growth kinetics of mono-associations *in vivo* and *in vitro***

Growth rates of *Curvibacter* did not significantly differ between the host and the microcosm environments. This is in marked contrast to *Duganella*, where significantly higher growth rates were observed in the non-host as compared to the host environment. In all environments, except for the host, *Duganella* achieved a significantly higher growth rate than *Curvibacter* (determined by post hoc t-tests; ANOVA:  $R^2=0.827$ ; Full model:  $F_{5,15} = 14.333$ ;  $P<0.0001$ ; bacterial species x environment:  $F_2 = 15.592$ ;  $P=0.0002$ ).

#### **Microbial di-association experiments *in vivo* and *in vitro***

##### *Carrying capacity*

Results of host and microcosm experiments (static and mixed) show that during di-associations the carrying capacity in all habitats is reached at about 72 h after inoculation. Both microcosm environments are characterized by a carrying capacity of  $10^7$ - $10^8$  CFUs/ml, and so exceeding the *in vivo* carrying capacity by a factor of  $10^4$  (Fig. 3). Nevertheless, di-associations on the host also fail to reach the carrying capacity of

wild-type polyps and reach a comparable carrying capacity as in the mono-colonisations of *Curvibacter*. Both bacterial species do not match the carrying capacities as measured in mono-colonisations on the host: whereas *Curvibacter* fails by a power of 10 to reach its density in the mono-colonisations, *Duganella* outgrows it by a power of 10.

#### *Changes in fractions in microbial di-association experiments*

When competing *Curvibacter* and *Duganella* in three different starting frequencies in the host, and the non-host environments, several interesting patterns can be observed (Fig. 4). In both non-host environments, *Duganella* outcompetes *Curvibacter* within 48 h post exposure. From then onwards, frequencies of *Curvibacter* are low, reaching a maximum of about 10%. This pattern does not depend on the initial frequency at the start of the experiment. The host shows a different pattern. Here, a decrease in *Curvibacter* fraction can be observed in all three initial frequencies but never to a point where it cannot be detected in the population. From 72 h post exposure onwards the population on the host has reached a stable state, with *Curvibacter* making up 20% of the total bacterial population.

#### *Microbial growth kinetics of di-associations*

Overall *Curvibacter* growth rate in di-associations are lower or not different from the mono-associations (Fig. 5; as estimated by post hoc contrasts; Generalized linear model: Full model:  $\chi^2=45.790$ , d.f.=11,  $P<0.0001$ ; environment x initial frequency:  $\chi^2=33.685$ , d.f.=6,  $P<0.0001$ ). *Curvibacter* grows significantly differently when inoculated in equal densities as compared to the rare and dominant starting frequencies across the different environments. Whereas in the host, *Curvibacter* grows better when in equal density with *Duganella*, the opposite is true for both *in vitro* environments.

As observed for the growth of *Duganella* in mono-colonisations, growth rates are always higher in the non-host environments irrespective of initial frequency (Generalized linear

model: Full model:  $\chi^2=130.278$ , d.f.=11,  $P<0.0001$ ; environment x initial frequency:  $\chi^2=59.723$ , d.f.=6,  $P<0.0001$ ). Whereas, in di-associations, negative growth rates can be detected only once for *Duganella*, it happens more frequently in the *Curvibacter*, indicating a direct or indirect negative effect of *Duganella*.

### *Relative performance of Curvibacter*

As estimation for the relative performance of *Curvibacter* in competition with *Duganella* we determined the selection rate constant ( $r$ ) for all di-association experiments [31, 32]. We observed  $r < 0$  for all environments and frequencies, indicating that *Curvibacter* performs worse than *Duganella* when they are in direct competition (Fig. 6). There is no overall effect of the initial frequency - only in the mixed environment differences can be detected with the lowest performance of *Curvibacter* at equal frequencies of the two competitors (Generalized linear model: Full model:  $\chi^2=51.168$ , d.f.=8,  $P<0.0001$ ; environment x initial frequency:  $\chi^2=19.147$ , d.f.=4,  $P=0.0007$ ). In general, *Curvibacter* performs significantly better in the host environment irrespective of initial frequency.

## **Discussion**

One of the major challenges in microbiome research is to understand the factors that influence the dynamics and stability of host-associated microbial communities. Of particular relevance for this are the processes governing assembly [33, 34] and resilience [35]. Insights into such processes in bacterial populations within their native host environments can be gained through a number of ways. Relationships between different community members in complex microbiomes, such as the human gut, can, for example, be inferred by analysing co-occurrence data and correlation patterns from sequencing-based metagenomic time-series experiments [36, 37]. Another approach, where ecological interactions can experimentally be dissected, allows for hypothesis testing. For this, a relatively simple system, such as *Hydra* and its microbiome is ideal for

‘deconstructing’ a metaorganism and its interactions [23]. This strategy is novel in meta-organism research but has yielded exciting results regarding rules that determine community assembly and stability in non-host associated microbial communities [38, 39]. In microbiome research, the added advantage of including a host provides the opportunity to study the performance of the individual microbiome members in their natural environment. In addition, the comparison of the *in vivo* to *in vitro* environments provides information on host effects in regulating its microbiome.

Carrying capacity is defined as the largest population size that an ecosystem can sustainably support without degrading the ecosystem. Therefore population size is constrained by the carrying capacity of the environment. This is also true for bacteria populating a particular environment, including hosts. In microbiome research, the significance of host carrying capacity has been largely overlooked until very recently where a link between host health and microbiome density has been reported [8]. The host’s carrying capacity ultimately sets the upper boundary for bacterial fitness relative to any competitors, and provides a reference for investigating the interactions within the host microbiota at spatial and temporal scales.

We here show that wild-type *Hydra* is characterized by a specific carrying capacity of about  $10^5$  bacteria per polyp that is stable in adult polyps and can be artificially assembled through the re-population of germ-free animals with the natural bacterial community. This is an important prerequisite for conducting the *in vivo* experiments, where colonization patterns of single species from *Hydra*’s microbiome are individually followed. When *Curvibacter* and *Duganella* are introduced separately to the host (in mono-associations), each bacterial species is capable to robustly colonize the host to high abundances, which are maintained throughout the experimental period, indicating the ability to independently utilize the resources of the *Hydra* habitat. While both species fail to reach their respective carrying capacities as compared to wild type *Hydra* by a factor of 10, their respective proportions of about 75% and 11% [26] are

nevertheless maintained. Results from the di-association experiments clearly show that the abundances and relative frequencies of *Curvibacter* and *Duganella* as measured in wild-type *Hydra* cannot be explained by their (positive) interactions in the host context alone as this led to a frequency reversal, making *Duganella* more abundant than *Curvibacter*. *Duganella* however reaches comparable carrying capacities as measured in wild-type *Hydra* polyps. This implies that the presence of *Curvibacter* has a positive effect on the performance of *Duganella* but *Duganella* negatively affects *Curvibacter* in the host habitat. These observations indicate that the less frequent community members (each 2% and less) are of central importance for reaching the full carrying capacity of the *Hydra* microbiome. We hypothesise that two aspects are of importance here – (i) the low abundant microbes might be able to utilize different resources as compared to *Curvibacter* and *Duganella* and so inhabit different ecological niches within the microbiome, which the two main colonizers cannot fill and (ii) they likely interact in a positive way (either directly or indirectly) with (at least) *Curvibacter*, enabling it to reach higher carrying capacities. It is thus important to note that *Hydra*'s carrying capacity is not solely determined by the host (resources) alone but also by the interactions within the microbiome.

To determine the relative importance of the host, interactions of *Curvibacter* and *Duganella*, and intrinsic properties of the bacteria, such as ability to grow, in shaping the observed patterns in the host environment, we performed the same mono- and di-association experiments in two *in vitro* environments. We chose to contrast static, which closely resembles the host habitat in that it provides spatial heterogeneity facilitating bacterial interactions and mixed, where direct interactions between individual bacteria cannot be established but where individual bacteria have (unlimited) access to resources and oxygen. Because community structure can be influenced by initial species abundances [40], we performed all di-association experiments using various initial starting frequencies. In general, both bacterial species reached much higher carrying

capacities in both *in vitro* environments as compared to the *in vivo* environment, with *Duganella* reaching up to  $10^8$  CFUs/ml and *Curvibacter* up to  $10^5$  CFUs/ml. Interestingly we were not able to replicate the *in vivo* dynamics between *Curvibacter* and *Duganella* *in vitro*, suggesting that the host mediates the interaction between the two bacterial species. Whereas pairwise competitions in the di-association experiments resulted in coexistence of *Curvibacter* and *Duganella* in the host habitat, it led to an overgrowth of *Duganella* in both *in vitro* habitats. More specifically, we found that in the *Hydra* habitat *Curvibacter*, independent of its inoculation frequency, and after the initial establishment period of 72 h, reached a constant fraction of about 20%, whereas it was only present at very low frequencies in both *in vitro* habitats due to the high continuous growth rates of *Duganella* (see also [30] for homogeneous environment).

Many host-associated microbial communities live in highly competitive surroundings, in which they struggle to persist. According to Ghoul and Mitri [41], a strain is competitive if it shows phenotypes that cause a fitness decrease in a competitor strain. Competition can be either passive, where strains compete for the same resources or active, where strains directly harm one another [41]. Li *et al.* [30] showed that during co-culture experiments in a homogenous environment the presence and frequency of *Curvibacter* greatly influenced the growth rate of *Duganella* (quadratic function), which we also found. Interestingly we find the same pattern on the host, although growth rates are drastically reduced. In the static environment we find the inverse of the quadratic function.

When comparing the bacterial growth rates in mono-associations we observe that *Curvibacter* performs equally well in all habitats, whereas *Duganella* shows a reduced growth rate compared to *Curvibacter* on the host and performs best in the non-host habitat. This suggests that *Duganella* is not particularly adapted to the host niche. Interestingly the two species also differ in their phylogenetic association patterns with different *Hydra* species [28]. Whereas different lineages of *Curvibacter* have been shown



to be associated with the majority (N=6) of *Hydra* species analysed (N=7), *Duganella* was detected in less than half (N=3). This indicates that *Duganella* is a more recent member of the *Hydra* microbiome and that it is not as co-evolved as it has been suggested for one of the keystone species of *Hydra*'s microbiome, *Curvibacter* [30]. The specific microbiome of *Hydra vulgaris*, which is studied here, has shown to be stable as animals living in the wild were colonized by a similar microbiome as compared to the ones that had been maintained in the laboratory for a relatively long time [24].

Oscillatory dynamics, chaotic fluctuations and stochastic perturbations influence species abundances and allow for the coexistence of many species and have therefore a significant impact on species survival even in simple communities containing only a few interacting species [42-44]. Interestingly we observed such sporadic collapses in the *Curvibacter* population during di-association experiments in the non-host environment but not on the host. An earlier study following the bacterial colonization pattern of *Hydra* hatchlings showed sporadic collapses of the *Curvibacter* population during the first 15 weeks post hatching [45]. In adult polyps, which were used in the experiments, we did not observe such dynamics, which points to the fact that these sporadic collapses might be buffered in adult polyps or are caused by the other species of the *Hydra* microbiome. For the zebrafish host model it has been shown that *Aeromonas* during mono-association is not resistant to disturbances related to intestinal motility and that in the presence of *Vibrio* the magnitude of collapses are even greater [22]. *Hydra* is also characterized by spontaneous contractile activity [29] but our data suggest that this does not have such far-reaching effects on the microbiota as found in the zebrafish gut.

Whereas in other host-microbe systems such as the zebrafish, *in vivo* dynamics between two bacterial species can be replicated *in vitro* [46], in our system this is not the case. We find the fitness of *Curvibacter* and *Duganella* to be highly dependent on the specific environments tested. Whereas *Duganella* performs best *in vitro*, in terms of carrying capacities reached, absolute fitness (growth rates) but also relative fitness

(fractions in population, selection rate constant), the opposite is true for all parameters in *Curvibacter* which generally performs best in the host habitat, except for its carrying capacity that is higher *in vitro*. Our experiments reveal that not only direct bacterial interactions are important but also highlight the fact that the host plays an important role in mediating these interactions. Further, we were able to show that carrying capacity is a fundamental property of a host-microbe system and that it is not only determined by the physiological features of the host but also by the interactions within the microbiome. Detecting a selection rate constant of  $r < 0$  for the main *Hydra* colonizer, *Curvibacter*, in the host environment and a reduced carrying capacity in both, mono- and di-associations, suggests that low-abundance species of the *Hydra* microbiome are likely playing a major role in maintaining the density of *Curvibacter* on the host. Evidence for the importance of rare-species comes from the human intestinal microbiota, which contains many low-abundance species [47] with some of them having a large impact on inducing dysbiosis in the microbiome and on guaranteeing host health [48, 49].

## Acknowledgements

PD received funding from the European Union's Framework Programme for Research and Innovation Horizon 2020 (2014–2020) under the Marie Skłodowska-Curie Grant Agreement No. 655914 and KH under the Marie Skłodowska-Curie Grant Agreement No. 657096. Both also received a Reintegration Grant from the Deutscher Akademischer Austausch Dienst (DAAD). This work was further supported by the Deutsche Forschungsgemeinschaft (DFG) Collaborative Research Center (CRC) 1182 ("Origin and Function of Metaorganisms"). TB gratefully appreciates support from the Canadian Institute for Advanced Research (CIFAR) and thanks the Wissenschaftskolleg (Institute of Advanced Studies) in Berlin for a sabbatical leave. We thank Chaitanya Gokhale for feedback on the manuscript.

## References

1. Turnbaugh PJ, Ley RE, Hamady M, Fraser-Liggett CM, Knight R, Gordon JI. The human microbiome project. *Nature* 2007;**449**: 804–810.
2. Huttenhower C, Gevers D, Knight R, Abubucker S, Badger JH, Chinwalla AT, *et al.* Structure, function and diversity of the healthy human microbiome. *Nature* 2012;**486**: 207–214.
3. Pasolli E, Asnicar F, Manara S, Zolfo M, Karcher N, Armanini F, *et al.* Extensive unexplored human microbiome diversity revealed by over 150,000 genomes from metagenomes spanning age, geography, and lifestyle. *Cell* 2019; **176**: 649–662.
4. Mueller UG, Sachs JL. Engineering microbiomes to improve plant and animal health. *Trends Microbiol* 2015; **23**: 606–617.
5. McKenney PT, Pamer EG. From hype to hope: The gut microbiota in enteric infectious disease. *Cell* 2015; **163**: 1326–1332.
6. Gilbert JA, Blaser MJ, Caporaso JG, Jansson JK, Lynch SV, Knight R. Current understanding of the human microbiome. *Nat Med* 2018; **24**: 392–400.
7. McKenzie VJ, Kueneman JG, Harris RN. Probiotics as a tool for disease mitigation in wildlife: insights from food production and medicine. *Ann N Y Acad Sci* 2018; **1429**: 18–30.
8. Contijoch EJ, Britton GJ, Yang C, Mogno I, Li Z, Ng R, *et al.* Gut microbiota density influences host physiology and is shaped by host and microbial factors. *eLife* 2019; **8**: e40553.
9. Lozupone CA, Stombaugh JI, Gordon JI, Jansson JK, Knight R. Diversity, stability and resilience of the human gut microbiota. *Nature* 2012; **489**: 220–230.
10. Sachs JL, Essenberg CJ, Turcotte MM. New paradigms for the evolution of beneficial infections. *Trends Ecol Evol* 2011; **26**: 202–209.
11. Deines P, Lachnit T, Bosch TCG. Competing forces maintain the *Hydra* metaorganism. *Immunol Rev* 2017; **279**: 123–136.

- 498 12. Macke E, Tasiemski A, Massol F, Callens M, Decaestecker E. Life history and eco-  
499 evolutionary dynamics in light of the gut microbiota. *Oikos* 2017; **126**: 508–531.
- 500 13. Eckburg PB, Bik EM, Bernstein CN, Purdom E, Dethlefsen Les, Sargent M, *et al.*  
501 Diversity of the human intestinal microbial flora. *Science* 2005; **308**: 1635–1638.
- 502 14. Zhang Z, Geng J, Tang X, Fan H, Xu J, Wen X, *et al.* Spatial heterogeneity and co-  
503 occurrence patterns of human mucosal-associated intestinal microbiota. *ISME J*  
504 2014; **8**: 881–893.
- 505 15. Britton RA, Young VB. Interaction between the intestinal microbiota and host in  
506 *Clostridium difficile* colonization resistance. *Trends Microbiol* 2012; **20**: 313–319.
- 507 16. Levy R, Borenstein E. Metagenomic systems biology and metabolic modeling of the  
508 human microbiome. *Gut Microbes* 2014; **5**: 265–270.
- 509 17. Zelezniak A, Andrejev S, Ponomarova O, Mende DR, Bork P, Patil KR. Metabolic  
510 dependencies drive species co-occurrence in diverse microbial communities. *Proc*  
511 *Natl Acad Sci USA* 2015; **112**: 6449–6454.
- 512 18. Garcia JR, Gerardo NM. The symbiont side of symbiosis: do microbes really  
513 benefit? *Front Microbiol* 2014; **5**: 510.
- 514 19. Wiser MJ, Lenski RE. A comparison of methods to measure fitness in *Escherichia*  
515 *coli*. *PLoS ONE* 2015; **10**: e0126210.
- 516 20. Lenski RE. Relative fitness: its estimation and its significance for environmental  
517 applications of microorganisms. In: Levin M, Seidler R, Rogul M (eds). *Microbial*  
518 *Ecology: Principles, Applications and Methods*. McGraw-Hill Book Co: New York, NY,  
519 USA, 1992, pp 183–198.
- 520 21. Mushegian AA, Ebert D. Rethinking “mutualism” in diverse host-symbiont  
521 communities. *Bioessays* 2015; **38**: 100–108.
- 522 22. Wiles TJ, Jemielita M, Baker RP, Schlomann BH, Logan SL, Ganz J, *et al.* Host gut  
523 motility promotes competitive exclusion within a model intestinal microbiota.  
524 *PLoS Biol* 2016; **14**: e1002517.

- 525 23. Deines P, Bosch TCG. Transitioning from microbiomecomposition to microbial  
526 community interactions: The potential of the metaorganism *Hydra* as an  
527 experimental model. *Front Microbiol* 2016; **7**: 1610.
- 528 24. Fraune S, Bosch TCG. Long-term maintenance of species-specific bacterial  
529 microbiota in the basal metazoan *Hydra*. *Proc Natl Acad Sci USA* 2007; **104**:  
530 13146–13151.
- 531 25. Bosch TCG. Cnidarian-microbe interactions and the origin of innate immunity in  
532 metazoans. *Annu Rev Microbiol* 2013; **67**:499–518.
- 533 26. Fraune S, Anton-Erxleben F, Augustin R, Franzenburg S, Knop M, Schröder K, *et al.*  
534 Bacteria-bacteria interactions within the microbiota of the ancestral metazoan  
535 *Hydra* contribute to fungal resistance. *ISME J* 2015; **9**: 1543–1556.
- 536 27. Lenhoff HM, Brown RD. Mass culture of *Hydra*: an improved method and its  
537 application to other aquatic invertebrates. *Lab Anim* 1970; **4**: 139–154.
- 538 28. Franzenburg S, Walter J, Künzel S, Wang J, Baines JF, Bosch TCG, *et al.* Distinct  
539 antimicrobial peptide expression determines host species-specific bacterial  
540 associations. *Proc Natl Acad Sci USA* 2013; **110**: E3730–E3738.
- 541 29. Murillo-Rincon AP, Klimovich A, Pemöller E, Taubenheim J, Mortzfeld B, Augustin  
542 R, *et al.* Spontaneous body contractions are modulated by the microbiome of  
543 *Hydra*. *Sci Rep* 2017; **7**:15937.
- 544 30. Li X-Y, Pietschke C, Fraune S, Altrock PM, Bosch TCG, Traulsen A. Which games are  
545 growing bacterial populations playing? *J R Soc Interface* 2015; **12**: 20150121.
- 546 31. Lenski RE, Rose MR, Simpson SC, Tadler SC. Long-term experimental evolution in  
547 *Escherichia coli*. I. Adaptation and divergence during 2,000 generations. *Am Nat*  
548 1991; **138**: 1315–1341.
- 549 32. Travisano M, Lenski RE. Long-term experimental evolution in *Escherichia coli*. IV.  
550 Targets of selection and the specificity of adaptation. *Genetics* 1996; **143**: 15–26.
- 551 33. Sonnenburg JL, Angenent LT, Gordon JL. Getting a grip on things: how do

- 552 communities of bacterial symbionts become established in our intestine? *Nat*  
553 *Immunol* 2004; **5**:569–573.
- 554 34. Shafquat A, Joice R, Simmons SL, Huttenhower C. Functional and phylogenetic  
555 assembly of microbial communities in the human microbiome. *Trends Microbiol*  
556 2014; **22**: 261–266.
- 557 35. Allison SD, Martiny JBH. Resistance, resilience, and redundancy in microbial  
558 communities. *Proc Natl Acad Sci USA* 2008; **105**: 11512–11519.
- 559 36. Faust K, Raes J. Microbial interactions: from networks to models. *Nat Rev*  
560 *Microbiol* 2012; **10**: 538–550.
- 561 37. Trosvik P, de Muinck EJ, Stenseth NC. Biotic interactions and temporal dynamics  
562 of the human gastrointestinal microbiota. *ISME J* 2015; **9**: 533–541.
- 563 38. Friedman J, Higgins LM, Gore J. Community structure follows simple assembly  
564 rules in microbial microcosms. *Nat Ecol Evol* 2017; **1**: 0109.
- 565 39. Higgins LM, Friedman J, Shen H, Gore J. Co-occurring soil bacteria exhibit a robust  
566 competitive hierarchy and lack of non-transitive interactions. *bioRxiv* 2017:  
567 175737. doi:10.1101/175737.
- 568 40. Fukami T. Historical contingency in community assembly: Integrating niches,  
569 species pools, and priority effects. *Annu Rev Ecol Evol Syst* 2015; **46**: 1–23.
- 570 41. Ghoul M, Mitri S. The ecology and evolution of microbial competition. *Trends*  
571 *Microbiol* 2016; **24**: 833–845.
- 572 42. Armstrong RA, McGehee R. Competitive exclusion. *Am Nat* 2015; **115**:151–170.
- 573 43. Sousa WP. The role of disturbance in natural communities. *Annu Rev Ecol Syst*  
574 1984; **15**: 353–391.
- 575 44. Huisman J, Weissing FJ. Biodiversity of plankton by species oscillations and chaos.  
576 *Nature* 1999; **402**: 407–410.
- 577 45. Franzenburg S, Fraune S, Altrock PM, Künzel S, Baines JF, Traulsen A, *et al.*  
578 Bacterial colonization of *Hydra* hatchlings follows a robust temporal pattern. *ISME*

579 *J* 2013; **7**: 781–790.

580 46. Rolig AS, Parthasarathy R, Burns AR, Bohannan BJM, Guillemin K. Individual  
581 members of the microbiota disproportionately modulate host innate immune  
582 responses. *Cell Host Microbe* 2015; **18**: 613–620.

583 47. Arumugam M, Raes J, Pelletier E, Le Paslier D, Yamada T, Mende DR, *et al.*  
584 Enterotypes of the human gut microbiome. *Nature* 2011; **473**: 174–180.

585 48. Hajishengallis G, Darveau RP, Curtis MA. The keystone-pathogen hypothesis. *Nat*  
586 *Rev Microbiol* 2012; **10**: 717–725.

587 49. Sokol H, Pigneur B, Watterlot L, Lakhdari O, Bermúdez-Humarán LG, Gratadoux J-J,  
588 *et al.* *Faecalibacterium prausnitzii* is an anti-inflammatory commensal bacterium  
589 identified by gut microbiota analysis of Crohn disease patients. *Proc Natl Acad Sci*  
590 *USA* 2008; **105**: 16731–16736.

591

## Figures

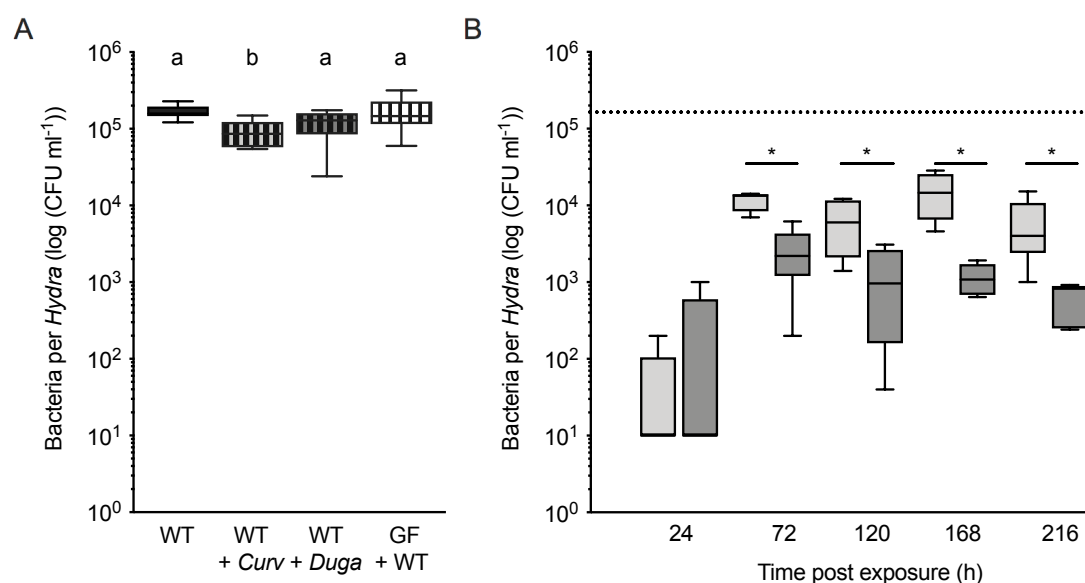

Fig 1. (A) Carrying capacity of the *Hydra* habitat in wild-type (WT) polyps, wild-type polyps and the addition of either the focal species *Curvibacter* (*Curv*) or *Duganella* (*Duga*) and germ-free (GF) animals incubated with native *Hydra* microbiota (conventionalised polyps) (each boxplot N≥6≤16). (B) Time course analysis of microbial abundances in mono-associations of germ-free polyps with either *Curvibacter* (light grey) or *Duganella* (dark grey) (each boxplot N=6). The dashed line indicates the carrying capacity of wild-type polyps.



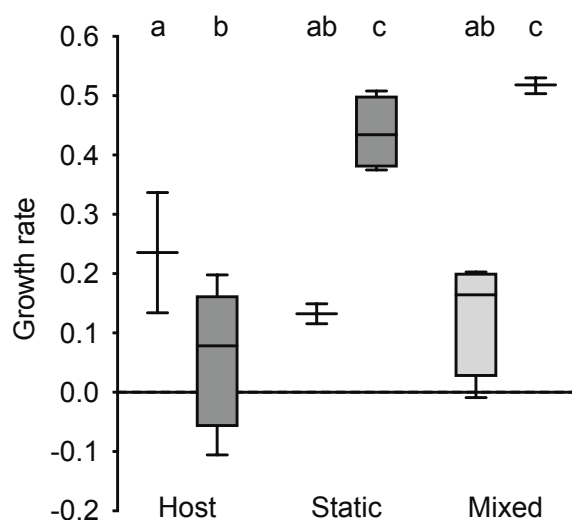

Fig 2. Bacterial growth rates of *Curvibacter* (light grey; each boxplot  $N \geq 2 \leq 4$ ) and *Duganella* (dark grey; each boxplot  $N \geq 3 \leq 6$ ) in mono-associations are habitat dependent. Compared are the host habitat (*in vivo*), and two *in vitro* environments: heterogeneous (static microcosms), and homogenous (mixed microcosms).

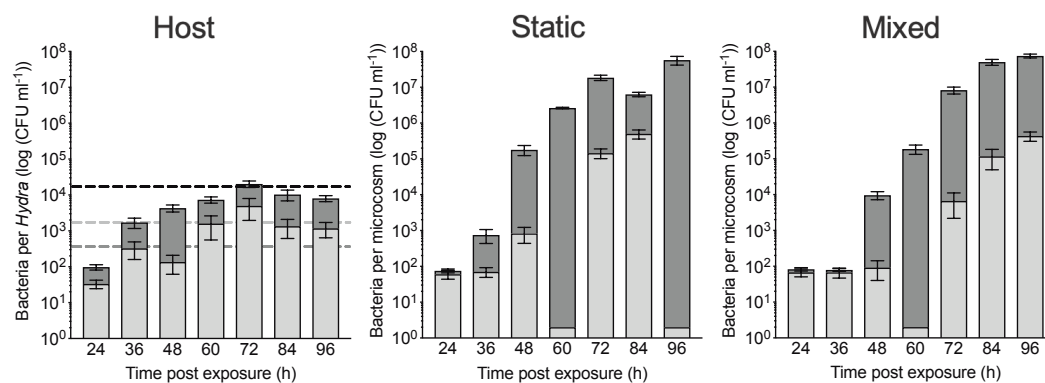

Fig 3. Carrying capacity of the *in vivo* and *in vitro* habitats used in this study. Shown are pooled total numbers of colony forming units (CFUs) from all di-association experiments with *Curvibacter* (light grey) and *Duganella* (dark grey) (shown are s.e.m. based on N≥11≤18 for the host, N≥9≤12 for static, and N≥4≤12 for mixed). The dashed black line indicates the carrying capacity of WT polyps, the light grey line the carrying capacity of polyps during *Curvibacter* mono-associations and the dark grey line the carrying capacity of polyps during *Duganella* mono-associations.

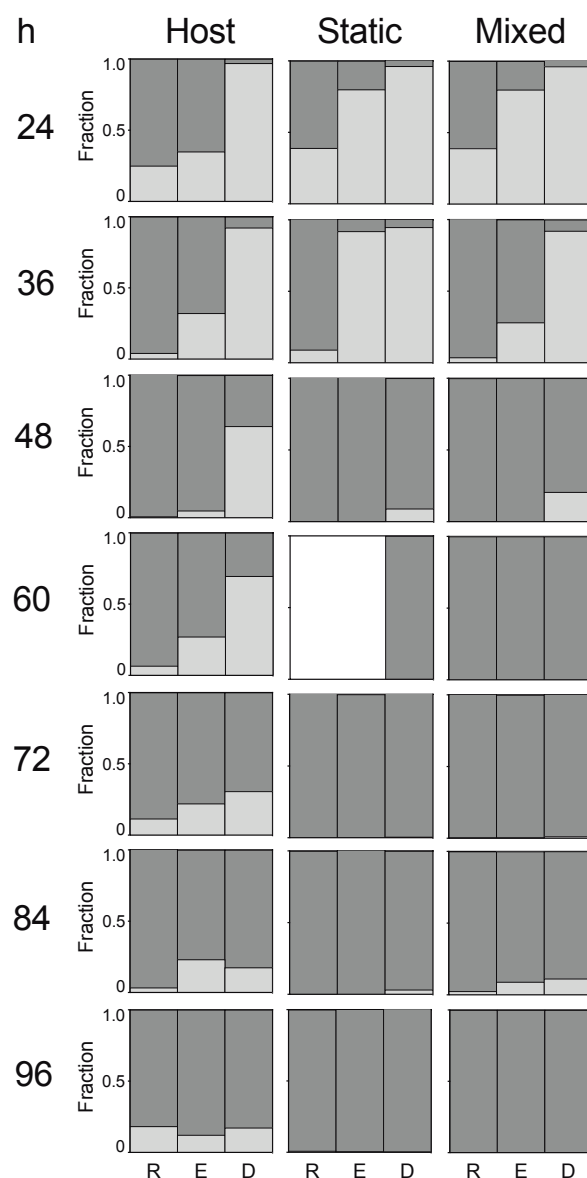

Fig 4. Time course of fractions of *Curvibacter* (light grey) and *Duganella* (dark grey) in the three different habitats obtained from di-association experiments. The initial inoculation frequency of *Curvibacter* varied from being rare (R), to equal (E), to dominant (D) in comparison to *Duganella* (each bar  $N \geq 3 \leq 6$ ; except for: Host, D, 24 h, where  $N=2$ , and for Static, R and E 60 h, where  $N=0$  due to contamination of plates).

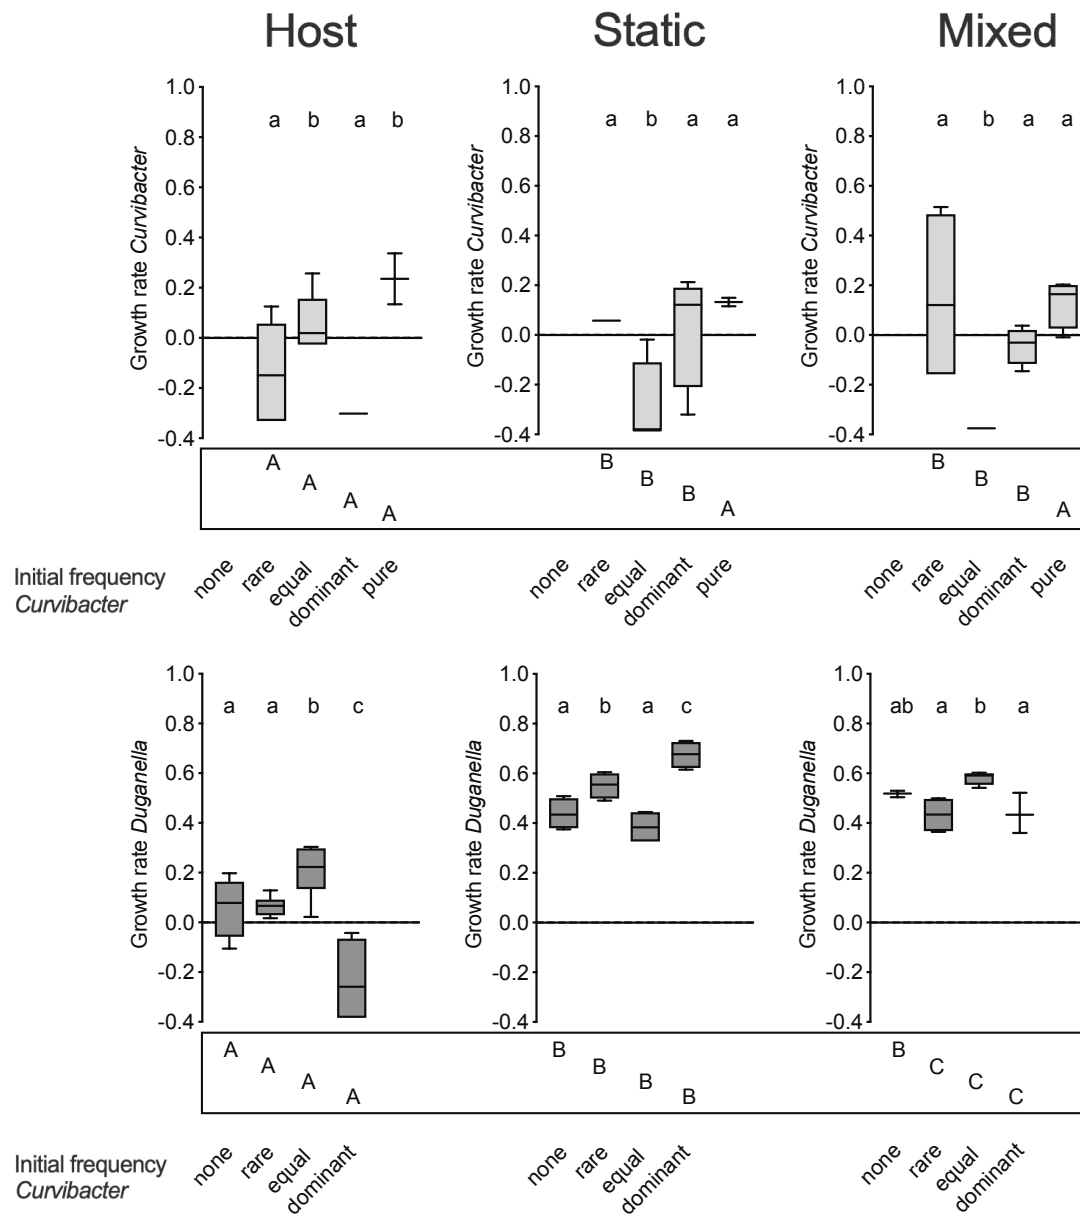

Fig 5. Bacterial growth rates of *Curvibacter* (light grey) and *Duganella* (dark grey) from mono- and di-association experiments across the different habitats and initial frequencies tested (each boxplot  $N \geq 3 \leq 4$ ).

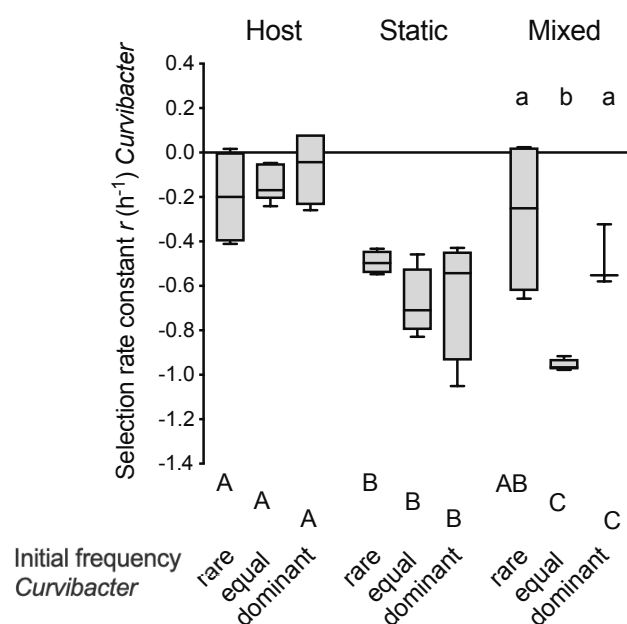

Fig. 6. Selection rate constants of *Curvibacter* based on competition experiments with *Duganella* for the different starting frequencies, (each boxplot  $N \geq 3 \leq 6$ ).

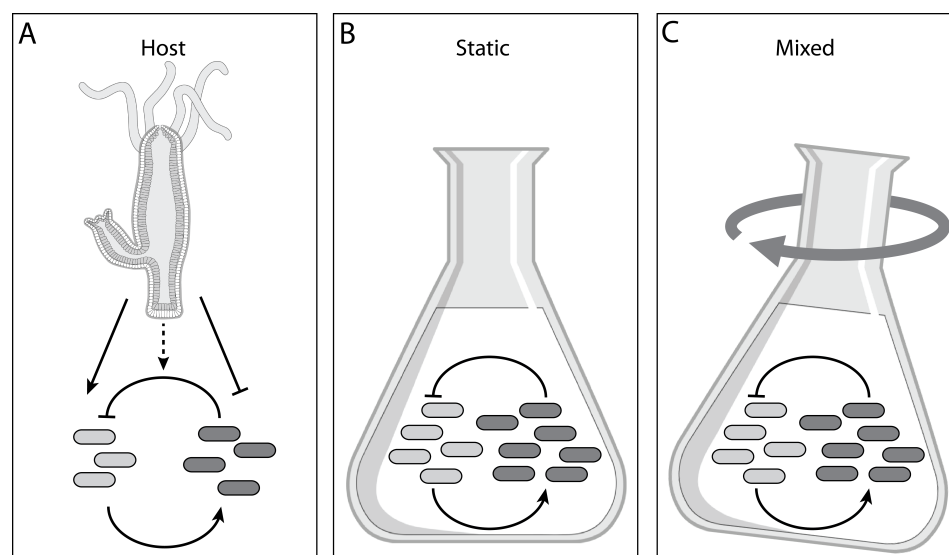

Fig. 7. Model of the microbe-microbe and host-microbe interactions occurring in different habitats (host (A) and non-host (B and C)) that influence bacterial abundances, which are indicated by the number of bacterial cells (*Curvibacter*: light grey, *Duganella*: dark grey). Whereas (A) allows to study the effect of the host environment on the two microbial species and their interactions, microcosm experiments allow to study species interaction in a heterogeneous (B) and a homogeneous environment (C). Arrow-headed lines indicate promotion, whereas bar-headed lines indicate inhibition.
